# Supplementary figures and images for: Indirect effects of COVID-19 on maternal, neonatal, child, sexual and reproductive health services in Kampala, Uganda
Source: HighWire-hosted journal article supplement (doi:10.1136/bmjgh-2021-006102), 2021-08-01

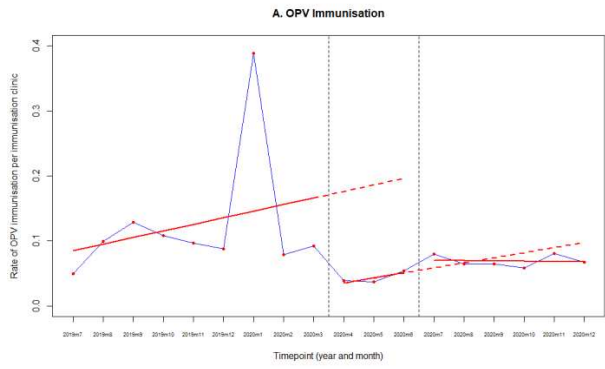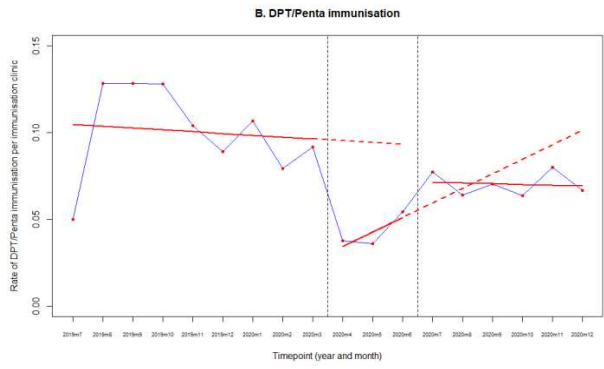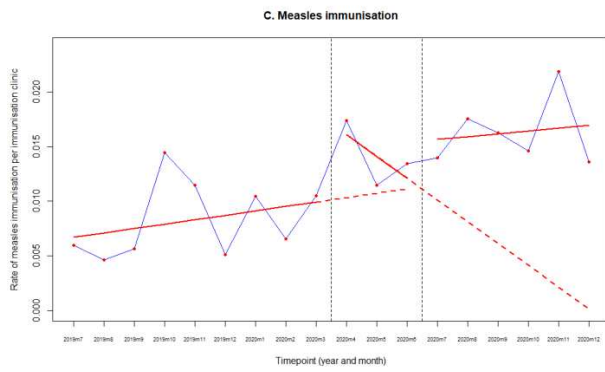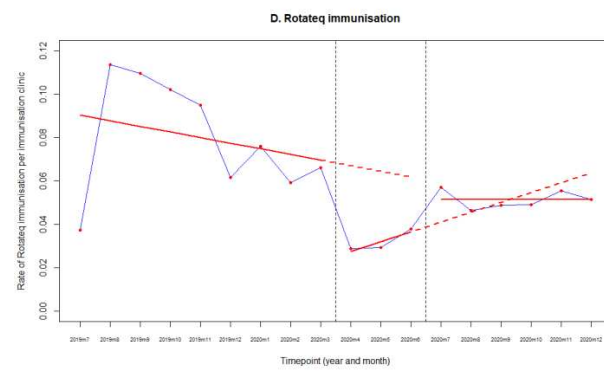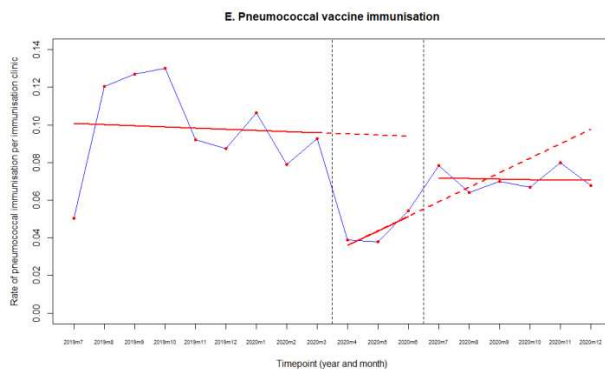

Supplement: bmjgh-2021-006102supp003_data_supplement.pdf [file bmjgh-2021-006102supp003_data_supplement.pdf]
